# Supplementary material for: Effects of shear stress on germ lineage specification of embryonic stem cells
Source: Royal Society of Chemistry journal article supplement (doi:10.1039/c2ib20040f), 2012-08-17
Supplement: c2ib20040f.pdf [file c2ib20040f.pdf]

**Supplemental Table 1.** List of PCR primers used to amplify genes that represent pluripotency and differentiation.

| Symbol                          | Gene Name                                                  | Marker of    | Forward Sequence (5' to 3') | Reverse Sequence (5' to 3') | Genebank Accession Number |
|---------------------------------|------------------------------------------------------------|--------------|-----------------------------|-----------------------------|---------------------------|
| <b>OCT4</b>                     | POU5F1                                                     | Pluripotency | CCGTGTGAGGTGGAGTCTGGAG      | GCGATGTGAGTGATCTGCTGTAGG    | NM_013633.1               |
| <b>NES</b>                      | Nestin                                                     | Ectoderm     | GGAGAAGCAGGGTCTACAG         | AGCCACTTCCAGACTAAGG         | NM_016701                 |
| <b>T-BRACHY</b>                 | T, Brachyury                                               | Mesoderm     | CACACCACTGACGCACAC          | GAGGCTATGAGGAGGCTTTG        | NM_009309                 |
| <b>AFP</b>                      | Alpha-fetoprotein                                          | Endoderm     | CACACCCGCTTCCCTCATCC        | TTCTTCTCCGTCACGCACTGG       | NM_007423                 |
| <b>MEOX1</b>                    | Mesenchyme homeobox 1                                      | Mesoderm     | GGCAGACGTGAAGCCTAGACA       | ACAAACACGTGGCCAGGAA         | NM_010791.3               |
| <b>PDGFR<math>\alpha</math></b> | Platelet-derived growth factor receptor, alpha polypeptide | Mesoderm     | GGCCGGCCTCATCTC             | TCATTCTCGTTGGGAGGATAGA      | NM_011058.2               |

Supplemental Table 2. List of genes included in the PCR arrays used to assess signalling pathways.

| Symbol                                            | Gene Name                                                                                                     | Description                                                                         | GenBank Accession Number |
|---------------------------------------------------|---------------------------------------------------------------------------------------------------------------|-------------------------------------------------------------------------------------|--------------------------|
| <b>SIGNAL TRANSDUCTION GENES</b>                  |                                                                                                               |                                                                                     |                          |
| Atf2                                              | Atf-2, CRE-BP, Creb2, D130078H02Rik, D18875, MGC105211, MGC105222, Tg(Gzma-Kfra1)7Wum, mxBP                   | Activating transcription factor 2                                                   | NM_009715                |
| Bax                                               |                                                                                                               | Bcl2-associated X protein                                                           | NM_007527                |
| Bcl2                                              | AW986256, Bcl-2, C430015F12Rik, D630044D05Rik, D830018M01Rik                                                  | B-cell leukemia/lymphoma 2                                                          | NM_009741                |
| Bcl2l1                                            | Bcl(XL), Bcl-XL, Bcl-Xs, Bcl2l, BclX, MGC113803, MGC99998, bcl-x                                              | Bcl2-like 1                                                                         | NM_009743                |
| Naip1                                             | AV364616, Bircl1a, D13Lsd1, Naip, Naip-rs1                                                                    | NLR family, apoptosis inhibitory protein 1                                          | NM_008670                |
| Birc2                                             | AW146227, Api1, Api2, Birc3, HIAP1, HIAP2, IAP1, IAP2, MIAP1, MIAP2, MIHB, MIHC, RNF48, cIAP1, cIAP2, mclAP1  | Baculoviral IAP repeat-containing 2                                                 | NM_007465                |
| Birc3                                             | AW107670, Api1, Api2, Birc2, HIAP2, IAP1, IAP2, MIAP1, MIAP2, MIHB, MIHC, RNF49, cIAP-1, cIAP-2, cIAP1, cIAP2 | Baculoviral IAP repeat-containing 3                                                 | NM_007464                |
| Birc5                                             | AAC-11, Api4, TIAP, survivin40                                                                                | Baculoviral IAP repeat-containing 5                                                 | NM_009689                |
| Bmp2                                              | AI467020, Bmp2a                                                                                               | Bone morphogenetic protein 2                                                        | NM_007553                |
| Bmp4                                              | Bmp-4, Bmp2b, Bmp2b-1, Bmp2b1                                                                                 | Bone morphogenetic protein 4                                                        | NM_007554                |
| Brcr1                                             |                                                                                                               | Breast cancer 1                                                                     | NM_009764                |
| Ccl2                                              | A1235594, HC11, JE, MCAF, MCP-1, MCP1, SMC-CF, Scya2, Sigle                                                   | Chemokine (C-C motif) ligand 2                                                      | NM_011333                |
| Ccl20                                             | CKb4, LARC, MIP-3A, MIP-3[a], MIP3A, ST38, Scya20, exodus-1                                                   | Chemokine (C-C motif) ligand 20                                                     | NM_016960                |
| Ccnd1                                             | A1327039, Cyl-1, PRAD1, bcl-1, cD1                                                                            | Cyclin D1                                                                           | NM_007631                |
| Cd5                                               | Ly-1, Ly-12, Ly-A, Lyt-1                                                                                      | CD5 antigen                                                                         | NM_007650                |
| Cdh1                                              | AA960649, Ecad, L-CAM, MGC107495, UVO, Um                                                                     | Cadherin 1                                                                          | NM_009864                |
| Cdk2                                              | A630093N05Rik                                                                                                 | Cyclin-dependent kinase 2                                                           | NM_016756                |
| Cdkn1a                                            | CAP20, CDK1, CIP1, Cdkn1, P21, SDI1, Waf1, mda6, p21Cip1, p21WAF                                              | Cyclin-dependent kinase inhibitor 1A (P21)                                          | NM_007669                |
| Cdkn1b                                            | AA408329, AI843786, Kip1, p27, p27Kip1                                                                        | Cyclin-dependent kinase inhibitor 1B                                                | NM_009875                |
| Cdkn2a                                            | ARF-INK4a, Arf, INK4a-ARF, Ink4a, Arf, MTS1, Pctr1, p16, p16(INK4a), p16INK4a, p19, p19ARF                    | Cyclin-dependent kinase inhibitor 2A                                                | NM_009877                |
| Cdkn2b                                            | AV083695, INK4b, MTS2, p15, p15(INK4b), p15INK4b                                                              | Cyclin-dependent kinase inhibitor 2B (p15, inhibits CDK4)                           | NM_007670                |
| Cebpb                                             | C, EBPbeta, CRP2, IL-6DBP, LAP, NF-IL6, NF-M, NF16                                                            | CCAAT/enhancer binding protein (C/EBP), beta                                        | NM_009883                |
| Csf2                                              | Csfgm, Gm-Csf, MGC151255, MGC151257, MGI-IGM                                                                  | Colony stimulating factor 2 (granulocyte-macrophage)                                | NM_009969                |
| Cxcl1                                             | Fsp, Gro1, KC, Mgsa, NS1, Scyb1, gro                                                                          | Chemokine (C-X-C motif) ligand 1                                                    | NM_008176                |
| Cxcl9                                             | BB139920, CMK, Mig, Scyb9, crg-10                                                                             | Chemokine (C-X-C motif) ligand 9                                                    | NM_008599                |
| Cyp19a1                                           | Ar, ARKO, Cyp19, Int-5, Int5, MGC124251, MGC124252, p450arom                                                  | Cytochrome P450, family 19, subfamily a, polypeptide 1                              | NM_007810                |
| Egr1                                              | A530045N19Rik, ETR103, Egr-1, Krox-1, Krox-24, Krox24, NGF1-A, NGF1-A, NGF1A, TIS8, Zenk, Zfp-6, Zif268, egr  | Early growth response 1                                                             | NM_007913                |
| Ei24                                              | AA536736, AI115355, PIG8                                                                                      | Etoposide induced 2.4 mRNA                                                          | NM_007915                |
| En1                                               | En-1, Mo-en-1                                                                                                 | Engrailed 1                                                                         | NM_010133                |
| Fas                                               | AI196731, APO-1, APT1, CD95, TNFR6, Tnfrsf6, lpr                                                              | Fas (TNF receptor superfamily member 6)                                             | NM_007987                |
| FasL                                              | APT1L1G1, CD178, CD95L, Fas-L, Fas-Ligand, Faslg, Tnfsf6, gld                                                 | Fas ligand (TNF superfamily, member 6)                                              | NM_010177                |
| Fasn                                              | A630082H08Rik, FAS                                                                                            | Fatty acid synthase                                                                 | NM_007988                |
| Fgf4                                              | Fgf-4, Fgfr, Hstf-1, K3, MGC129266, MGC129267, hst, hst-1, KFGF                                               | Fibroblast growth factor 4                                                          | NM_010202                |
| Fn1                                               | E330027I09, Fn, Fn-1, MGC117493                                                                               | Fibronectin 1                                                                       | NM_010233                |
| Fos                                               | D12Rfj1, c-fos                                                                                                | FBJ osteosarcoma oncogene                                                           | NM_010234                |
| Foxa2                                             | HNF3-beta, HNF3beta, Hnf-3b, Hnf3b, Tcf-3b, Tcf3b                                                             | Forkhead box A2                                                                     | NM_010446                |
| Gadd45a                                           | AA545191, Ddtt1, GADD45                                                                                       | Growth arrest and DNA-damage-inducible 45 alpha                                     | NM_007836                |
| Greb1                                             | 5730583K22Rik, 9130004E13, AF180470, AU023194, mKIAA0575                                                      | Gene regulated by estrogen in breast cancer protein                                 | NM_015764                |
| Gys1                                              | Gys3, MGS                                                                                                     | Glycogen synthase 1, muscle                                                         | NM_030678                |
| Hhip                                              | Hhip1                                                                                                         | Hedgehog-interacting protein                                                        | NM_020259                |
| Hk2                                               | AI642394, HKII                                                                                                | Hexokinase 2                                                                        | NM_013820                |
| Hoxa1                                             | ERA1, Hox-1.6                                                                                                 | Homeo box A1                                                                        | NM_010449                |
| Hsf1                                              | AA960185                                                                                                      | Heat shock factor 1                                                                 | NM_008296                |
| Hspb1                                             | 27Kda, Hsp25                                                                                                  | Heat shock protein 1                                                                | NM_013560                |
| Icam1                                             | CD54, Icam-1, Ly-47, MALA-2, MGC6195                                                                          | Intercellular adhesion molecule 1                                                   | NM_010493                |
| Igfbp3                                            | AI649005, IGFBP-3, IGFBP3                                                                                     | Insulin-like growth factor binding protein 3                                        | NM_008343                |
| Igfbp4                                            | AI875747, Deb2, IGFBP-4                                                                                       | Insulin-like growth factor binding protein 4                                        | NM_010517                |
| Ikkb                                              | AI132552, IKK-2, IKK-beta, IKK2, IKK[b], IKKbeta                                                              | Inhibitor of kappaB kinase beta                                                     | NM_010546                |
| Il1a                                              | il-1a                                                                                                         | Interleukin 1 alpha                                                                 | NM_010554                |
| Il2                                               | il-2                                                                                                          | Interleukin 2                                                                       | NM_008366                |
| Il2ra                                             | CD25, Il2r, Ly-43, MGC130561                                                                                  | Interleukin 2 receptor, alpha chain                                                 | NM_008367                |
| Il4ra                                             | CD124, Il4r, MGC118473                                                                                        | Interleukin 4 receptor, alpha                                                       | NM_001008700             |
| Irf1                                              | AU020929, irf-1                                                                                               | Interferon regulatory factor 1                                                      | NM_008390                |
| Jun                                               | AP-1, Junc, c-jun                                                                                             | Jun oncogene                                                                        | NM_010591                |
| Lef1                                              | 3000002B05, AI451430, Lef-1                                                                                   | Lymphoid enhancer binding factor 1                                                  | NM_010703                |
| Lep                                               | ob, obese                                                                                                     | Leptin                                                                              | NM_008493                |
| Lta                                               | LT, LT-[a], LT-alpha, LT[a], LTalpha, Ltx, MGC117668, TNF-beta, TNFSF1, Trnb, Tnfsf1b, hlb382                 | Lymphotoxin A                                                                       | NM_010735                |
| Mdm2                                              | 170000715Rik, AA415488, Mdm-2                                                                                 | Transformed mouse 3T3 cell double minute 2                                          | NM_010786                |
| Mmp10                                             | AV377895                                                                                                      | Matrix metalloproteinase 10                                                         | NM_019471                |
| Mmp7                                              | MAT                                                                                                           | Matrix metalloproteinase 7                                                          | NM_010810                |
| Myc                                               | AU016757, Myc2, Nard, Nird, bHLHe39, c-myc                                                                    | Myelocytomatosis oncogene                                                           | NM_010849                |
| Nab2                                              | AI451907                                                                                                      | Nrg1-A binding protein 2                                                            | NM_008668                |
| Nfkb1                                             | AI462015, Nfkb1                                                                                               | Nuclear factor of kappa light polypeptide gene enhancer in B-cells inhibitor, alpha | NM_010907                |
| Nos2                                              | NOS-II, Nos-2, Nos2a, i-NOS, INOS                                                                             | Nitric oxide synthase 2, inducible                                                  | NM_010927                |
| Nrip1                                             | 6030458L20Rik, 8430438I05Rik, 9630050P12, AA959574, AW456757, RIP140                                          | Nuclear receptor interacting protein 1                                              | NM_173440                |
| Odc1                                              | MGC103389, ODC                                                                                                | Ornithine decarboxylase, structural 1                                               | NM_013614                |
| Pparg                                             | Nr1c3, PPAR-gamma, PPAR-gamma2, PPARgamma, PPARgamma2                                                         | Peroxisome proliferator activated receptor gamma                                    | NM_011146                |
| Ptch1                                             | A230106A15Rik, Ptc, Ptc1, Ptc, mes                                                                            | Patched homolog 1                                                                   | NM_008957                |
| Ptgs2                                             | COX2, Cox-2, PGHS-2, PHS-2, Pghs2, TIS10                                                                      | Prostaglandin-endoperoxide synthase 2                                               | NM_011198                |
| Rbp1                                              | CRBP1, Crbp, Rbp-1                                                                                            | Retinol binding protein 1, cellular                                                 | NM_011254                |
| Sele                                              | CD62E, E-selectin, Elam                                                                                       | Selectin, endothelial cell                                                          | NM_011345                |
| Selp                                              | CD62P, Gmp, MGC129336, MGC129337, P-selectin, PADGEM                                                          | Selectin, platelet                                                                  | NM_011347                |
| Tank                                              | C86182, E430026L09Rik, I-TRAF                                                                                 | TRAF family member-associated NF-kappa B activator                                  | NM_011529                |
| Tcf7                                              | AI465550, TCF-1, Tcf1                                                                                         | Transcription factor 7, T-cell specific                                             | NM_009331                |
| Tert                                              | EST2, MGC150124, TCS1, TP2, TR, TRT                                                                           | Telomerase reverse transcriptase                                                    | NM_009354                |
| Tfrc                                              | 2610028K12Rik, AI195355, AI426448, AU015758, CD71, E430033M20Rik, Mtvr-1, Mtvr1, TFR, TFR1, Trfr, p90         | Transferrin receptor                                                                | NM_011638                |
| Pmepa1                                            | 2210418I02Rik, AW455466, Erg1.2, N4wbpd, Stag1, Tmepa1                                                        | Prostate transmembrane protein, androgen induced 1                                  | NM_022995                |
| Tnf                                               | DIF, MGC151434, TNF-alpha, TNFSF2, TNFalpha, Tnfa, Tnfsf1a                                                    | Tumor necrosis factor                                                               | NM_013693                |
| Trp53                                             | bb1, bfy, bhy, p53                                                                                            | Transformation related protein 53                                                   | NM_011640                |
| Vcam1                                             | CD106, Vcam-1                                                                                                 | Vascular cell adhesion molecule 1                                                   | NM_011693                |
| Vegfa                                             | Vegf, Vegf-a, Vegf120, Vegf164, Vegf188, Vp                                                                   | Vascular endothelial growth factor A                                                | NM_009505                |
| Wsp1                                              | AW146261, Elm1                                                                                                | WNT1 inducible signaling pathway protein 1                                          | NM_018865                |
| Wnt1                                              | Int-1, Wnt-1, sw, wnting                                                                                      | Wingless-related MMTV integration site 1                                            | NM_021279                |
| Wnt2                                              | 2610510E18Rik, Int11, Irp, Mirp, Wnt-2, Wnt2a, m-irp                                                          | Wingless-related MMTV integration site 2                                            | NM_023653                |
| <b>HOUSEKEEPING GENES &amp; INTERNAL CONTROLS</b> |                                                                                                               |                                                                                     |                          |
| Gusb                                              | A1747421, Gur, Gus, Gus-r, Gus-s, Gus-t, Gus-u, Gut, asd, g                                                   | Glucuronidase, beta                                                                 | NM_010368                |
| Hprt1                                             | C81579, HPGRT, Hprt, MGC103149                                                                                | Hypoxanthine guanine phosphoribosyl transferase 1                                   | NM_013556                |
| Hsp90ab1                                          | 90Kda, AL022974, C81438, Hsp84, Hsp84-1, Hsp90, Hspcb, MGC115780                                              | Heat shock protein 90 alpha (cytosolic), class B member 1                           | NM_008302                |
| Gapdh                                             | Gapd, MGC102544, MGC102546, MGC103190, MGC103191, MGC105239                                                   | Glyceraldehyde-3-phosphate dehydrogenase                                            | NM_008084                |
| Actb                                              | Actb, E430023M04Rik, beta-actin                                                                               | Actin, beta                                                                         | NM_007393                |
| MGDC                                              | MIGX1B                                                                                                        | Mouse Genomic DNA Contamination                                                     | SA_00106                 |
| RTC                                               | RTC                                                                                                           | Reverse Transcription Control                                                       | SA_00104                 |
| RTC                                               | RTC                                                                                                           | Reverse Transcription Control                                                       | SA_00104                 |
| RTC                                               | RTC                                                                                                           | Reverse Transcription Control                                                       | SA_00104                 |
| PPC                                               | PPC                                                                                                           | Positive PCR Control                                                                | SA_00103                 |
| PPC                                               | PPC                                                                                                           | Positive PCR Control                                                                | SA_00103                 |
| PPC                                               | PPC                                                                                                           | Positive PCR Control                                                                | SA_00103                 |

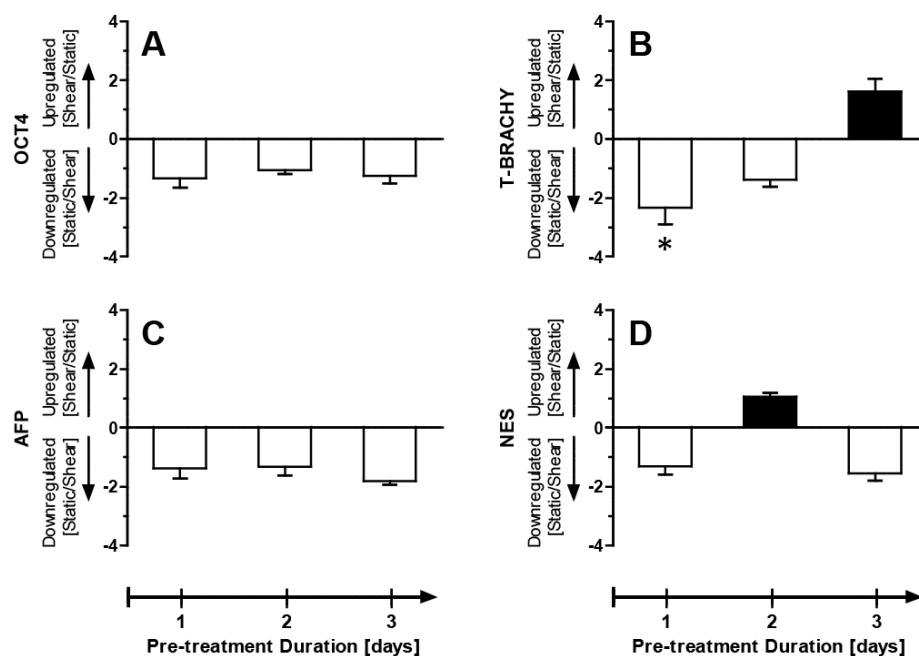

**Supplemental Fig. 1** Effect of pre-treatment duration. Cells were pre-treated with static culture for 1, 2, or 3 days. All experimental samples were then exposed to 15 dyne/cm<sup>2</sup> of shear stress for one day and assessed for gene expression (M / M GAPDH) of OCT4 (A), T-BRACHY (B), AFP (C), and NES (D). Data is presented as relative fold regulation between experimental and matched static controls, where upregulation (Shear/Static>1) is represented by black bars and downregulation (Static/Shear>1) is represented by white bars. A ratio of 1 represents no change between groups. Data presented are averages (mean  $\pm$  SEM; n = total of 9-12 replicates from 3 or 4 independent trials) where asterisks indicate a significant p<0.05) difference between experimental and control groups.
